# Supplementary material for: Activation of KATP channels suppresses glucose production in humans
Source: JCI journal article supplement (doi:10.1172/jci58035), 2011-11-07
Supplement: sd1 [file 1]

301 Moved Permanently

# Moved Permanently

The document has moved here.
